# Supplementary material for: Air-Bubble-Insensitive Microfluidic Lactate Biosensor for Continuous Monitoring of Lactate in Sweat
Source: PubMed Central journal article supplement (PMC10294251; doi:10.1021/acssensors.3c00490), 2023-05-22
Supplement: se3c00490_si_001.pdf [file se3c00490_si_001.pdf]

Supporting information

## **Air-bubble insensitive microfluidic lactate biosensor for continuous monitoring of lactate in sweat**

Isao Shitanda,<sup>1,2\*</sup> Yuro Ozone,<sup>1‡</sup> Yuki Morishita,<sup>3‡</sup> Hiroyuki Matsui,<sup>4</sup> Noya Loew,<sup>1,‡</sup>  
Masahiro Motosuke,<sup>2,3</sup> Takahiro Mukaimoto,<sup>2,5</sup> Momoko Kobayashi,<sup>6</sup> Taketo  
Mitsuhara,<sup>7</sup> Yamato Sugita,<sup>7</sup> Kensuke Matsuo,<sup>7</sup> Shinya Yanagita,<sup>2,5</sup> Tatsunori Suzuki,<sup>6</sup>  
Tsutomu Mikawa,<sup>8</sup> Hikari Watanabe,<sup>1</sup> and Masayuki Itagaki<sup>1,2</sup>

<sup>1</sup> Department of Pure and Applied Chemistry, Faculty of Science and Technology, Tokyo University of Science, 2641 Yamazaki, Noda, Chiba 278-8510, Japan

<sup>2</sup> Research Institute for Science and Technology, Tokyo University of Science, 2641 Yamazaki, Noda, Chiba 278-8510, Japan

<sup>3</sup> Department of Mechanical Engineering, Faculty of Engineering, Tokyo University of Science, 6-3-1 Nijuku, Katsushika-ku, Tokyo 125-8585, Japan

<sup>4</sup> Research Center for Organic Electronics (ROEL), Yamagata University, 4-3-16 Jonan, Yonezawa, Yamagata 992-8510, Japan

<sup>5</sup> Institute of Arts and Sciences, Tokyo University of Science, 2641 Yamazaki, Noda, Chiba 278-8510, Japan

<sup>6</sup> Department of Pharmacy, Faculty of Pharmaceutical Sciences, Tokyo University of Science, 2641 Yamazaki, Noda, Chiba 278-8510, Japan

<sup>7</sup> Department of Globe Fire Science and Technology, Faculty of Science and Technology, Tokyo University of Science, 2641 Yamazaki, Noda, Chiba 278-8510, Japan

<sup>8</sup> RIKEN Center for Biosystems Dynamics Research, 1-7-22 Suehiro-cho, Tsurumi-ku, Yokohama, Kanagawa 230-0045, Japan

‡These authors contributed equally

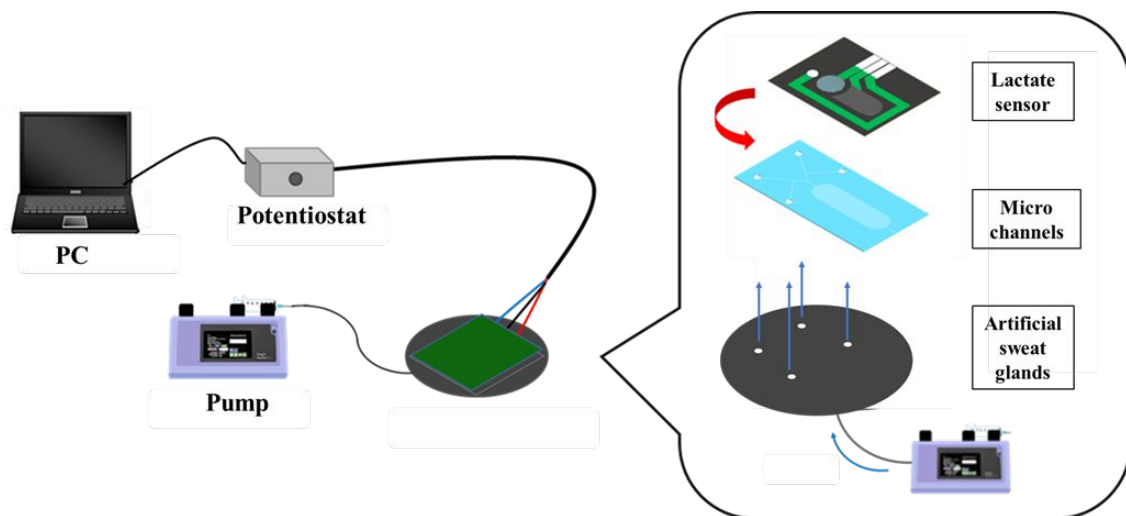

**Figure S1.** Measurement methods. A syringe pump was used to supply the solution to the microchannels through artificial sweat glands.

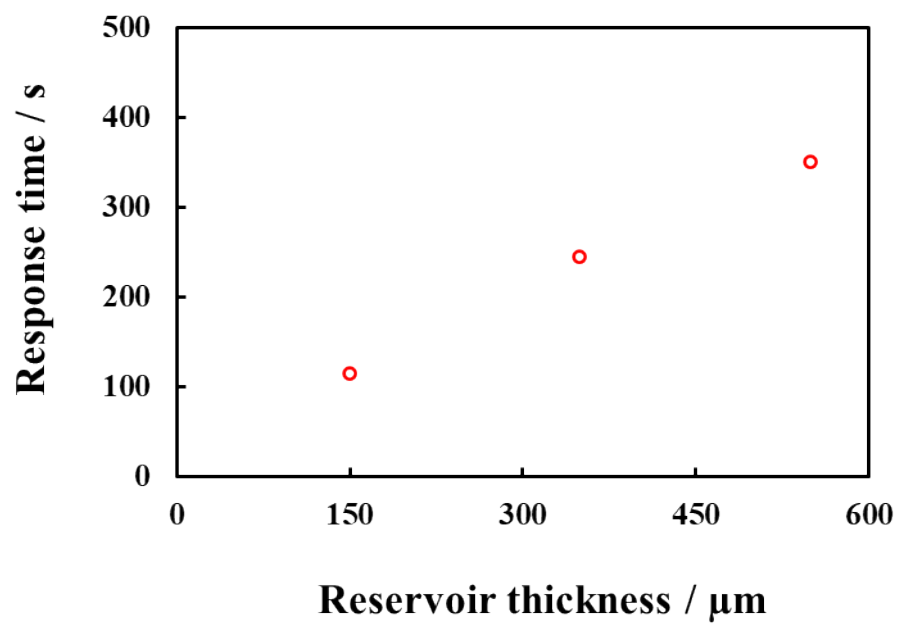

**Figure S2.** Relationship between lactate-sensor response time and reservoir thickness.

The response time is defined as the time required for the reservoir to fill the solution and stabilize the sensor response.

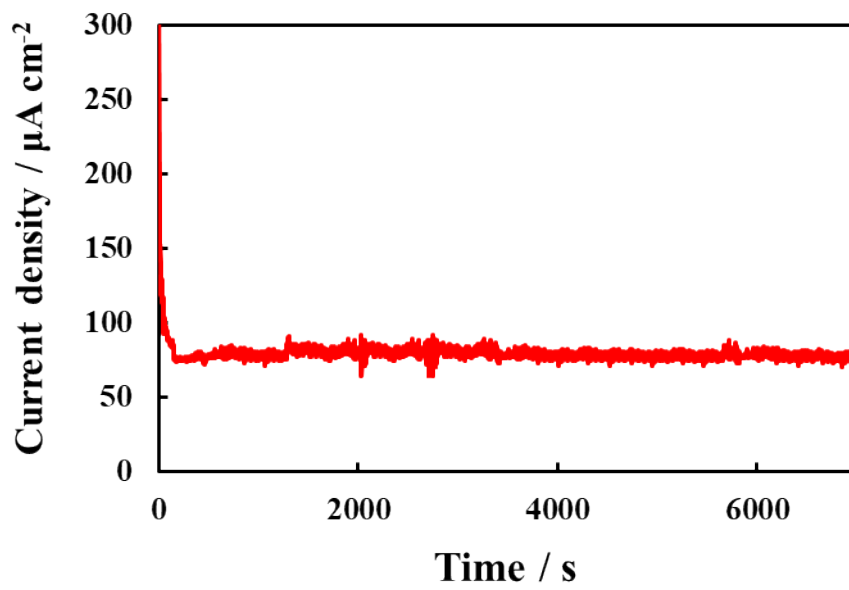

**Figure S3.** Responses of lactate sensor with microfluidics in 0.1 M phosphate buffer (pH 4.5) containing 20 mM lactate at 10  $\mu\text{L}/\text{min}$  flow rate.
